# Supplementary material for: Self-Healable and Recyclable Biomass-Derived Polyurethane Networks through Carbon Dioxide Immobilization
Source: MDPI journal article supplement (doi:10.3390/polym13244381), 2021-12-14
Supplement: s1 [file s1]

## Self-Healable and Recyclable Biomass-Derived Polyurethane Networks through Carbon Dioxide Immobilization

*Seohyun Baek<sup>†</sup>, Juhyen Lee<sup>†</sup>, Hyunwoo Kim, Inhwan Cha, and Changsik Song<sup>\*</sup>*

Department of Chemistry, Sungkyunkwan University, Suwon, Gyeonggi, 16419, Republic of Korea

\*Email: [songcs@skku.edu](mailto:songcs@skku.edu).

### Table of Contents

#### 1. Supplementary Figures and Tables

|                                                                                                           |    |
|-----------------------------------------------------------------------------------------------------------|----|
| T <sub>v</sub> calculation method                                                                         | S2 |
| Table S1. Synthesis of TBDPSO-R <sub>1</sub> -Br                                                          | S3 |
| Scheme S1. Optimizing conditions for the deprotection of FCD-Ps                                           | S3 |
| Figure S1. FTIR spectra of PCU-1H, PCU-3H, and PCU-3M in the prepolymer state (a) and the film state (b)  | S4 |
| Figure S2. Swelling tests of PCU-1H (a), PCU-1M (b), PCU-3H (c), and PCU-3M (d)                           | S5 |
| Figure S3. Stress relaxation analyses (SRA) of PCU-1H (a), PCU-3H (b), and PCU-3M (c) through a rheometer | S6 |
| Table S2. SRA of PCU-1H, PCU-3H and PCU-3M films                                                          | S6 |
| Figure S4. TMA of PCU-1M films before and after healing                                                   | S6 |

#### 2. NMR spectra of the synthesized compounds S7

### **T<sub>v</sub> Calculation Method**

In order to obtain T<sub>v</sub>, the relaxation time (τ) was plotted versus 1000/T according to the Arrhenius type equation (eq. 1) where R is the normal gas constant (8.314 J·K<sup>-1</sup>mol<sup>-1</sup>), E<sub>a</sub> is the activation energy, and T is the temperature. Specifically, the eq. 1 can be transformed to the linear function (eq. 2): y = ax + b. The E<sub>a</sub> can be calculated from the slope in the plot of lnτ versus 1000/T.

$$\tau(T) = \tau_0 \cdot e^{\frac{E_a}{RT}} \quad (\text{eq. 1})$$

$$\ln\tau(T) = \frac{E_a}{R \cdot T} + \ln\tau_0 = a \cdot \frac{1000}{T} + b \quad (\text{eq. 2})$$

The T<sub>v</sub> is the parameter of temperature for vitrimer materials, below which the bond exchange reaction does not occur and they maintain their topology like a frozen state. This means that when the material undergoes the “liquid”-to-“solid” transition, the viscosity (η) reaches 10<sup>12</sup> Pa. The equation between the viscosity (η) and the stress relaxation time (τ) follows the Maxwell relation (eq. 3), when the E' is the equilibrium storage modulus at rubbery plateau. Using (eq. 2) and (eq. 3), T<sub>v</sub> can be derived from (eq. 4).

$$\eta = \frac{1}{3} \times E' \times \tau \quad (\text{eq. 3})$$

$$T_v = \frac{1000 \cdot a}{\ln\left(\frac{3 \cdot \eta}{E'}\right) - b} \quad (\text{eq. 4})$$

**Table S1.** Synthesis of TBDPSO-R<sub>1</sub>-Br<sup>a</sup>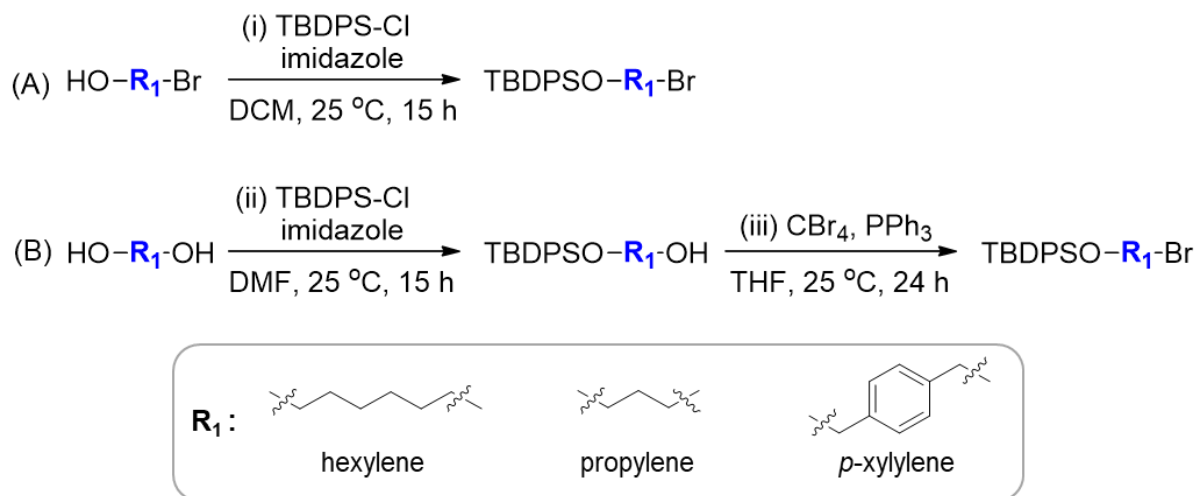

| Entry | Method | R <sub>1</sub>     | Yield <sup>b</sup> |
|-------|--------|--------------------|--------------------|
| 1     | A      | hexylene           | 89%                |
| 2     | A      | propylene          | 87%                |
| 3     | B      | <i>p</i> -xylylene | 99% <sup>c</sup>   |

<sup>a</sup>Condition: (Method A) (i) HO-R-Br (1.0 eq), TBDPS-Cl (1.1 eq), imidazole (1.5 eq), DCM (0.70 M), under an N<sub>2</sub> atmosphere. (Method B) (ii) HO-R-OH (4.0 eq), TBDPS-Cl (1.0 eq), imidazole (3.1 eq), DMF (0.10 M), under an N<sub>2</sub> atmosphere, (iii) TBDPSO-R<sub>1</sub>-OH (1.0 eq), CBr<sub>4</sub> (1.5 eq), PPh<sub>3</sub> (1.5 eq), THF (0.10 M), under an N<sub>2</sub> atmosphere. <sup>b</sup>Isolated yield. <sup>c</sup>overall isolated yield.

**Scheme S1.** Optimizing conditions for the deprotection of FCD-Ps.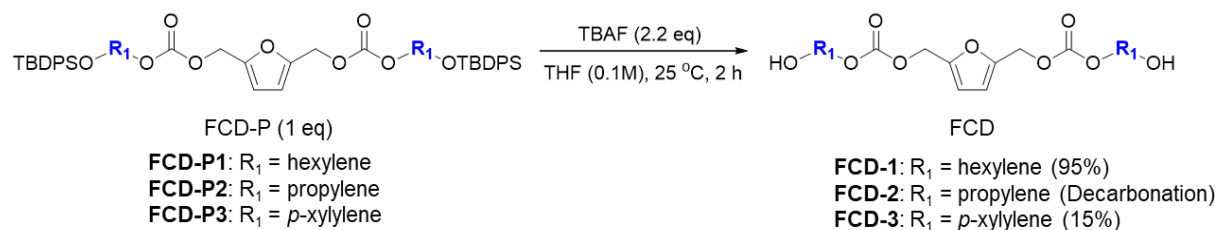

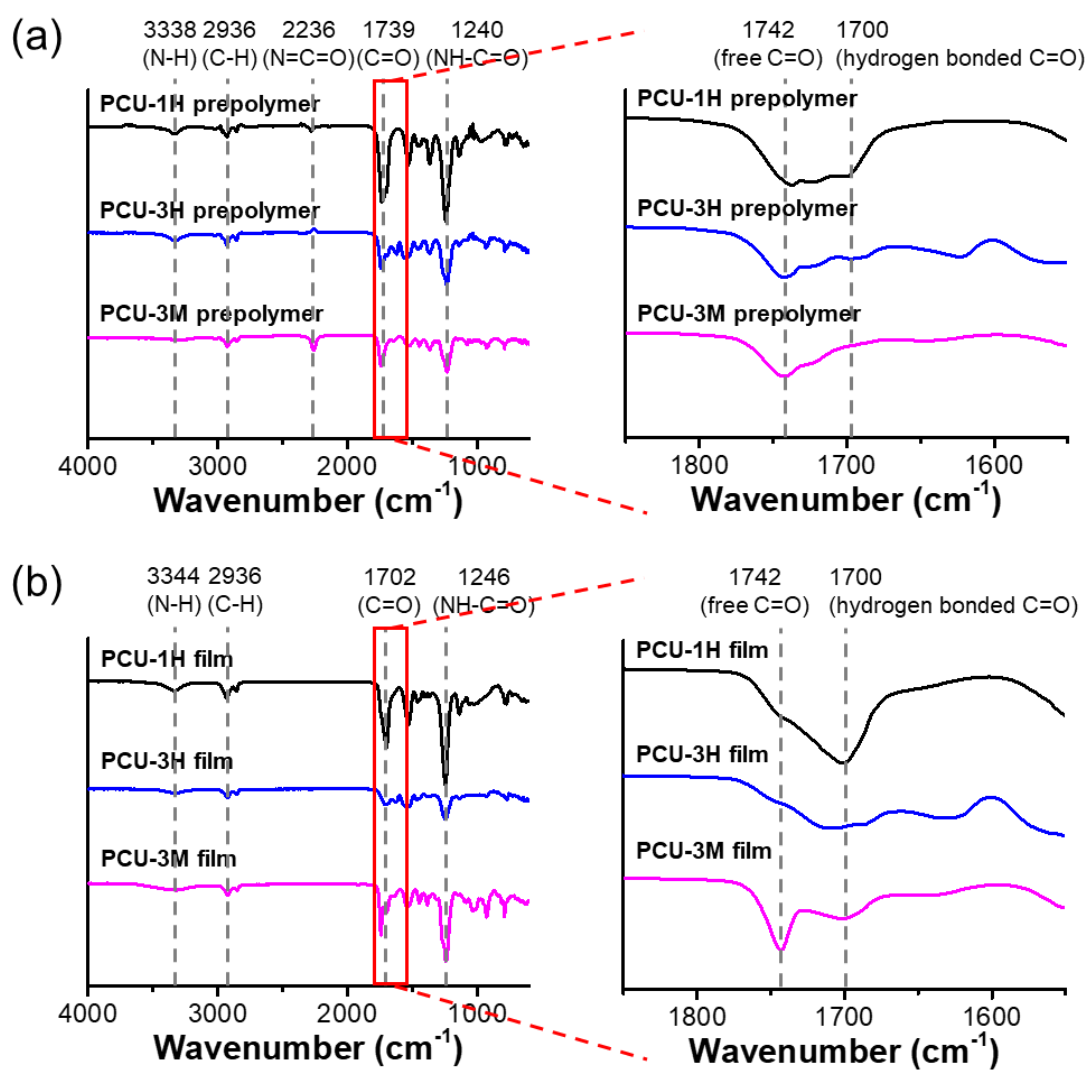

**Figure S1.** FTIR spectra of PCU-1H, PCU-3H, and PCU-3M in the prepolymer state (a) and the film state (b)

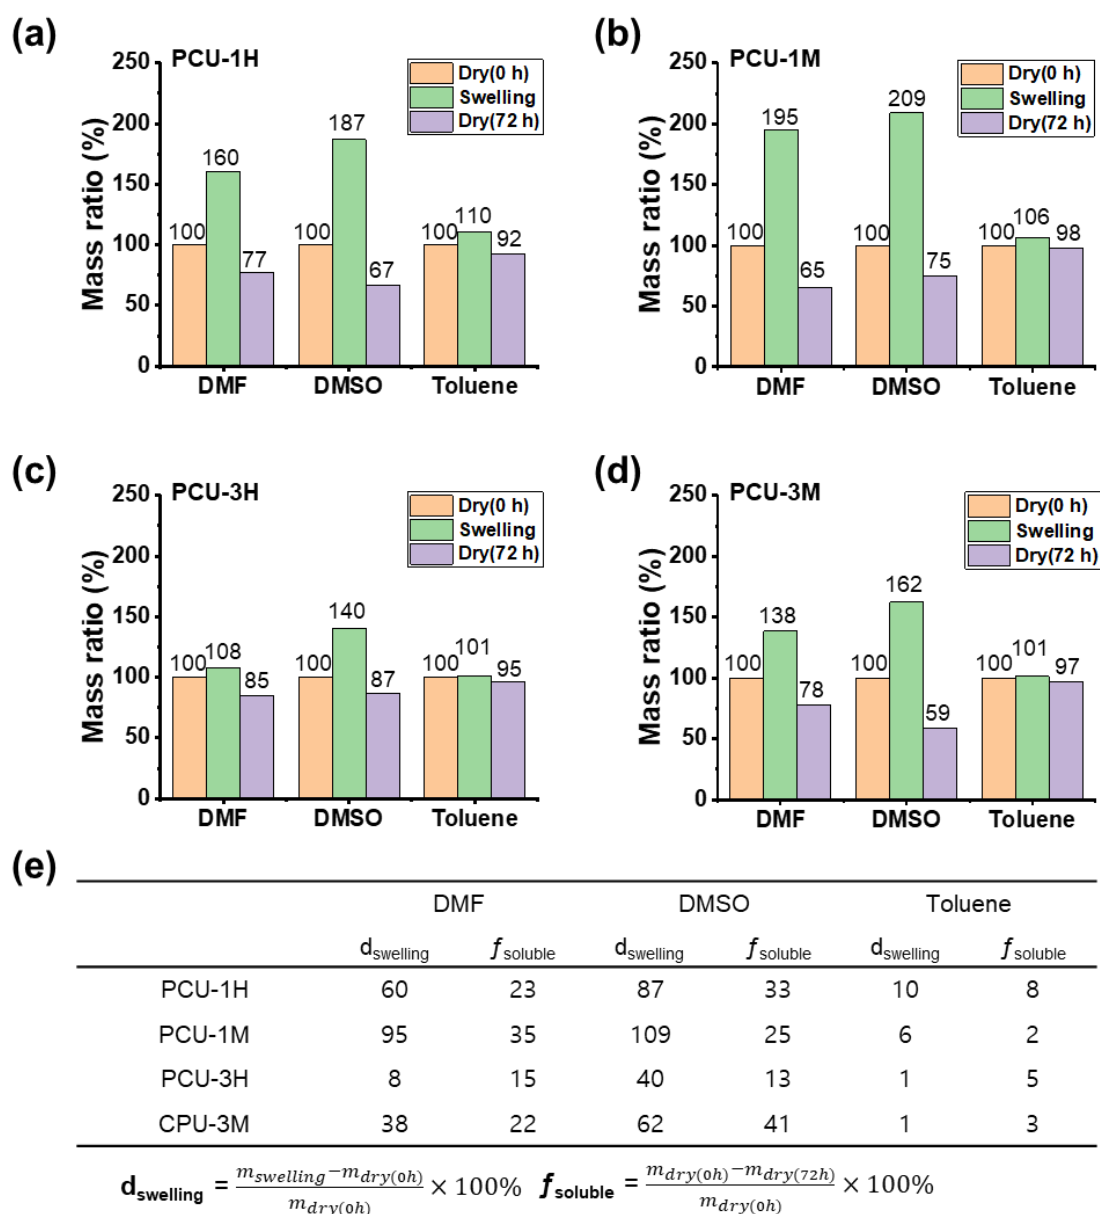

**Figure S2.** Swelling tests in common laboratory solvents (DMF, DMSO, and toluene) by measuring the masses of the dry state at 0 h (orange) and at 72 h (grey), as well as the solvent-uptaken state (green) of (a) PCU-1H, (b) PCU-1M, (c) PCU-3H and (d) PCU-3M at room temperature. The swelling degree ( $d_{\text{swelling}}$ ) and the solubility fractions ( $f_{\text{soluble}}$ ) were presented in the table (e).

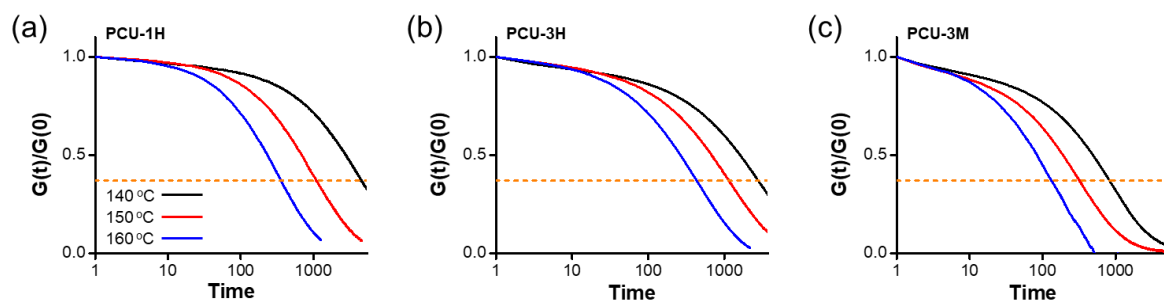

**Figure S3.** SRA of PCU-1H (a), PCU-3H (b), and PCU-3M (c) through a rheometer

**Table S2.** SRA of PCU-1H, PCU-3H and PCU-3M films

| Entry  | Storage modulus ( $E'$ ) | a     | b      |
|--------|--------------------------|-------|--------|
| PCU-1H | 4.2 MPa                  | 22.42 | -45.94 |
| PCU-3H | 122 MPa                  | 16.62 | -32.29 |
| PCU-3M | 0.54 MPa                 | 16.33 | -32.85 |

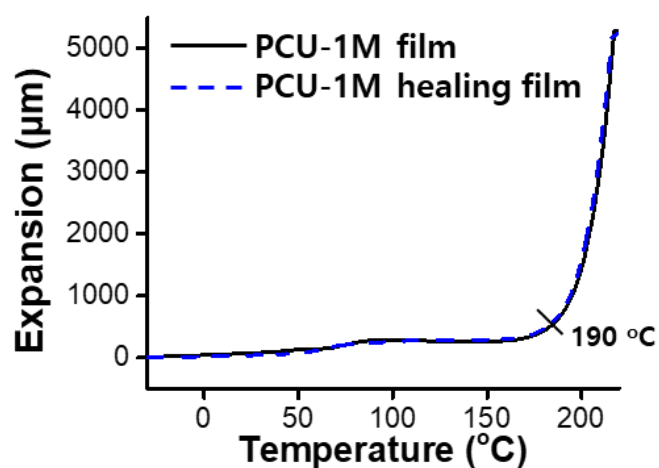

**Figure S4.** TMA of PCU-1M film before and after healing

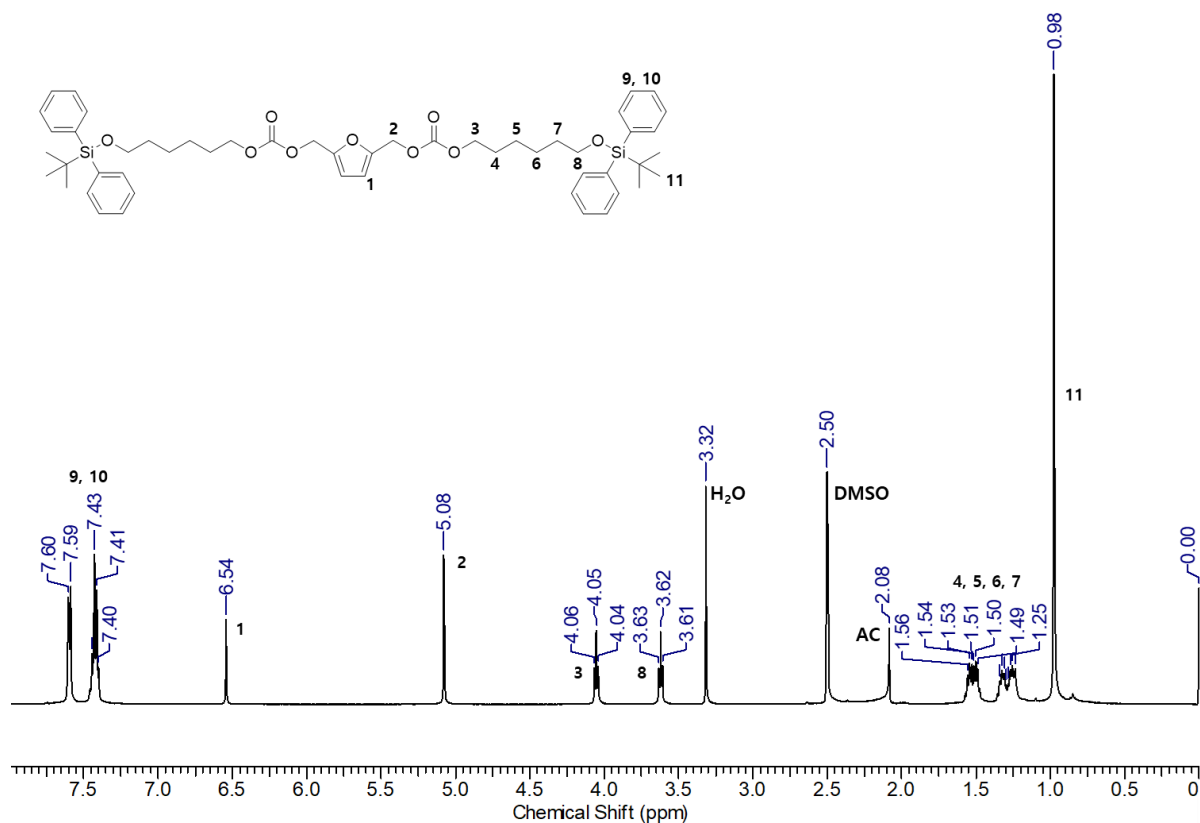

**Figure S5.**  $^1\text{H}$  NMR spectrum of **FCD-P1** (500 MHz,  $\text{DMSO-}d_6$ )

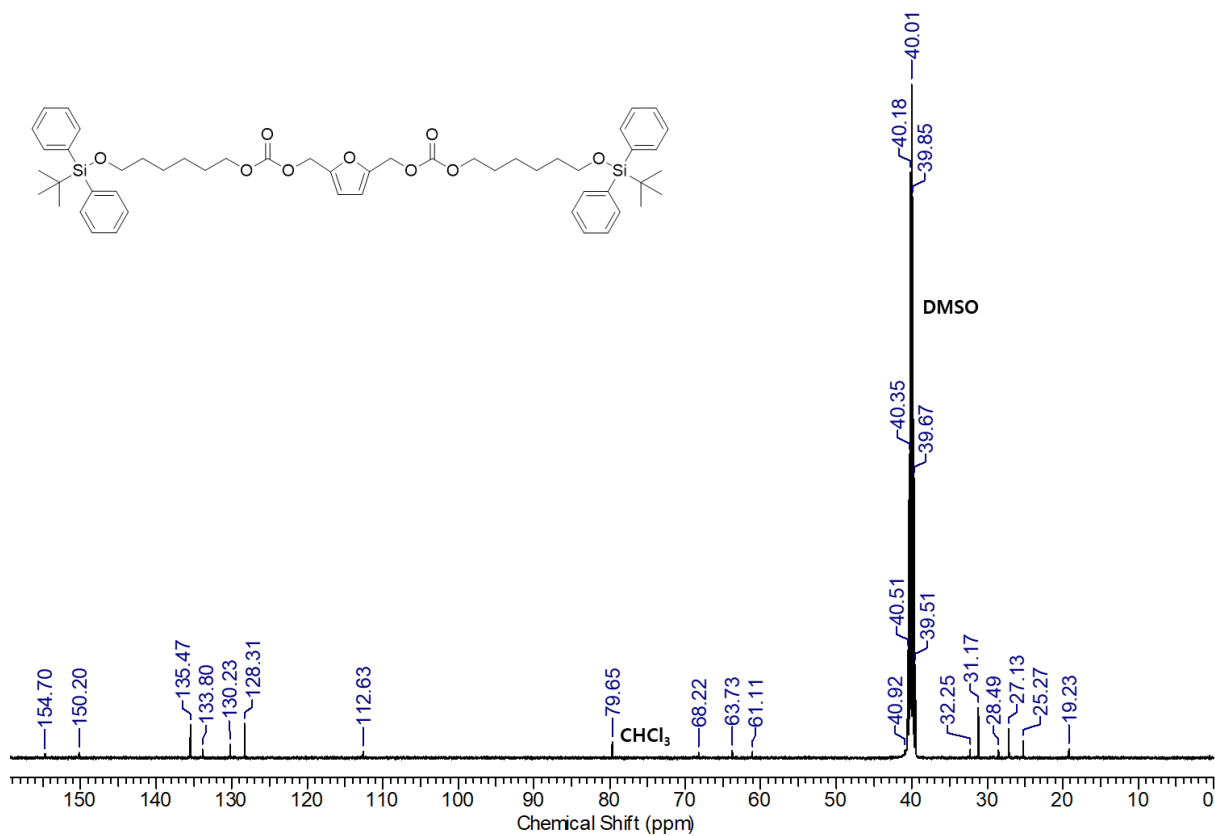

**Figure S6.**  $^{13}\text{C}$  NMR spectrum of **FCD-P1** (125 MHz,  $\text{DMSO-}d_6$ )

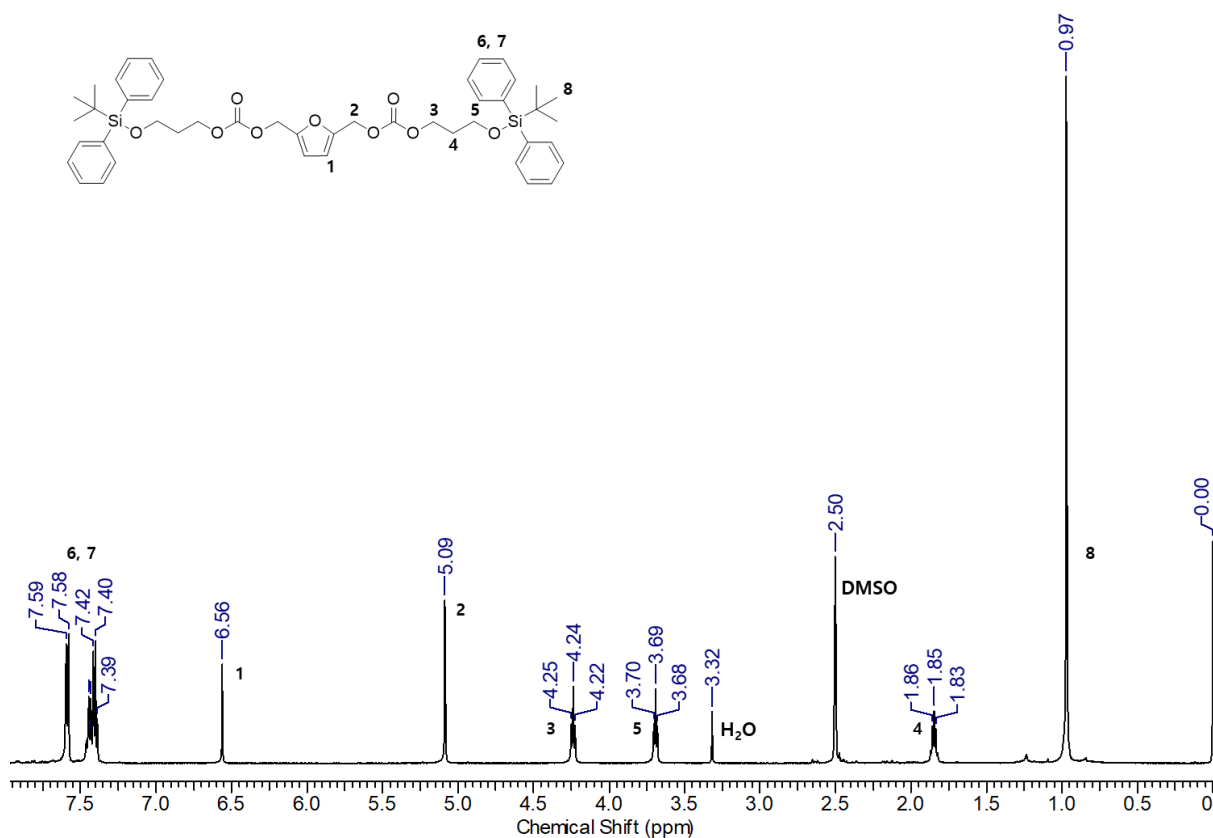

**Figure S7.**  $^1\text{H}$  NMR spectrum of FCD-P2 (500 MHz,  $\text{DMSO}-d_6$ )

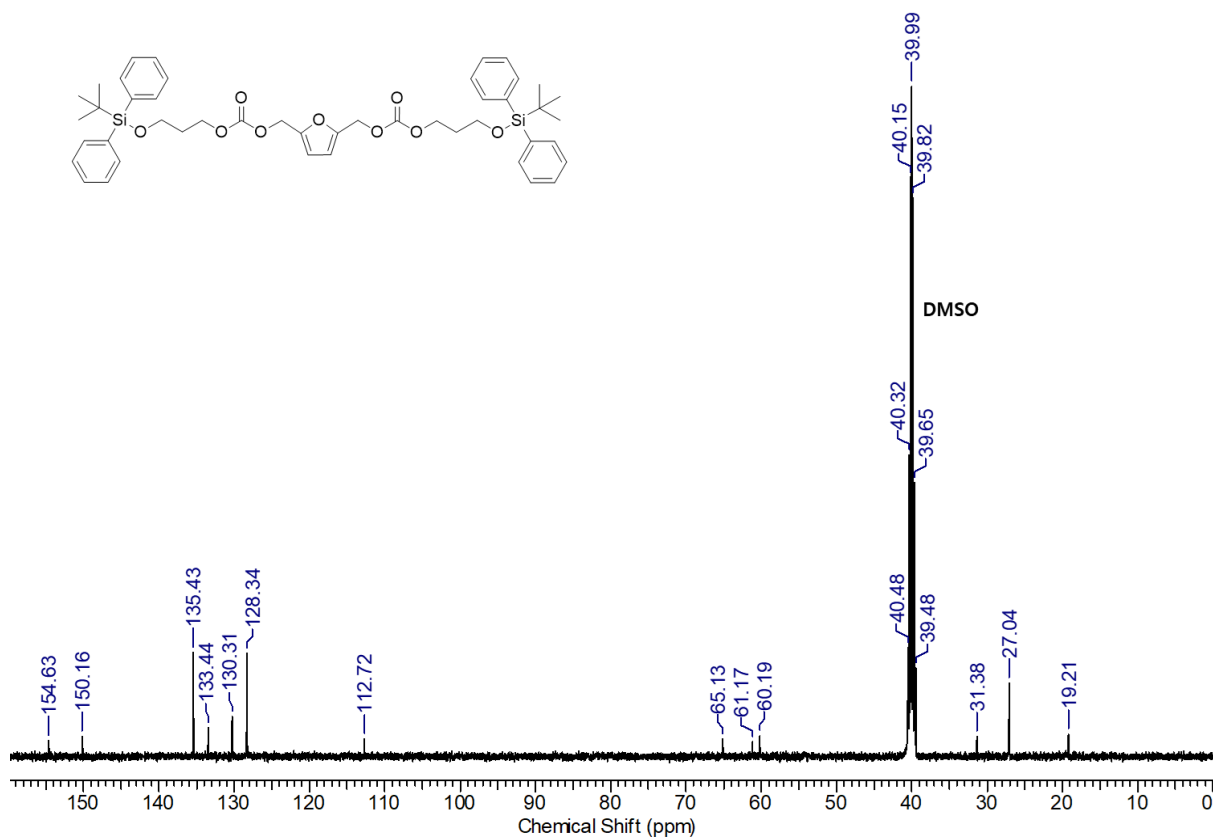

**Figure S8.**  $^{13}\text{C}$  NMR spectrum of FCD-P2 (125 MHz,  $\text{DMSO}-d_6$ )



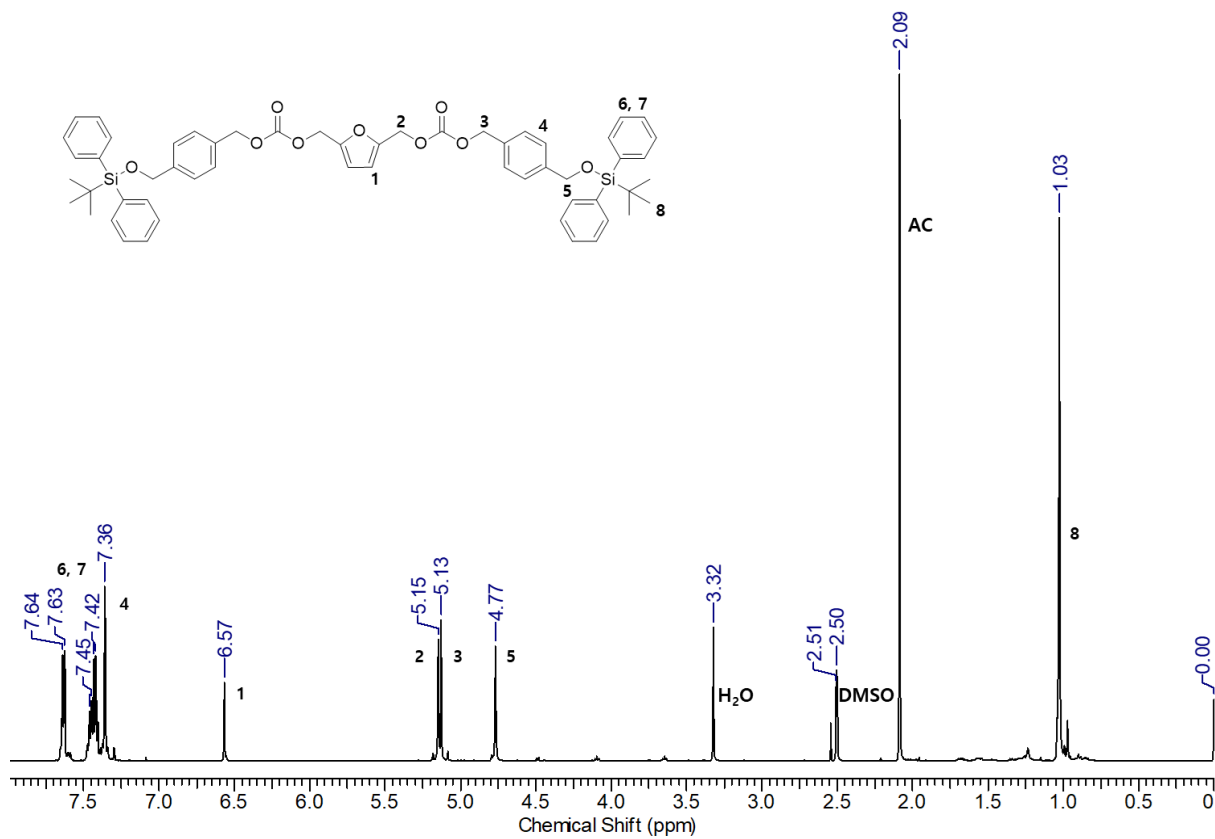

**Figure S9.** <sup>1</sup>H NMR spectrum of FCD-P3 (500 MHz, DMSO-*d*<sub>6</sub>)

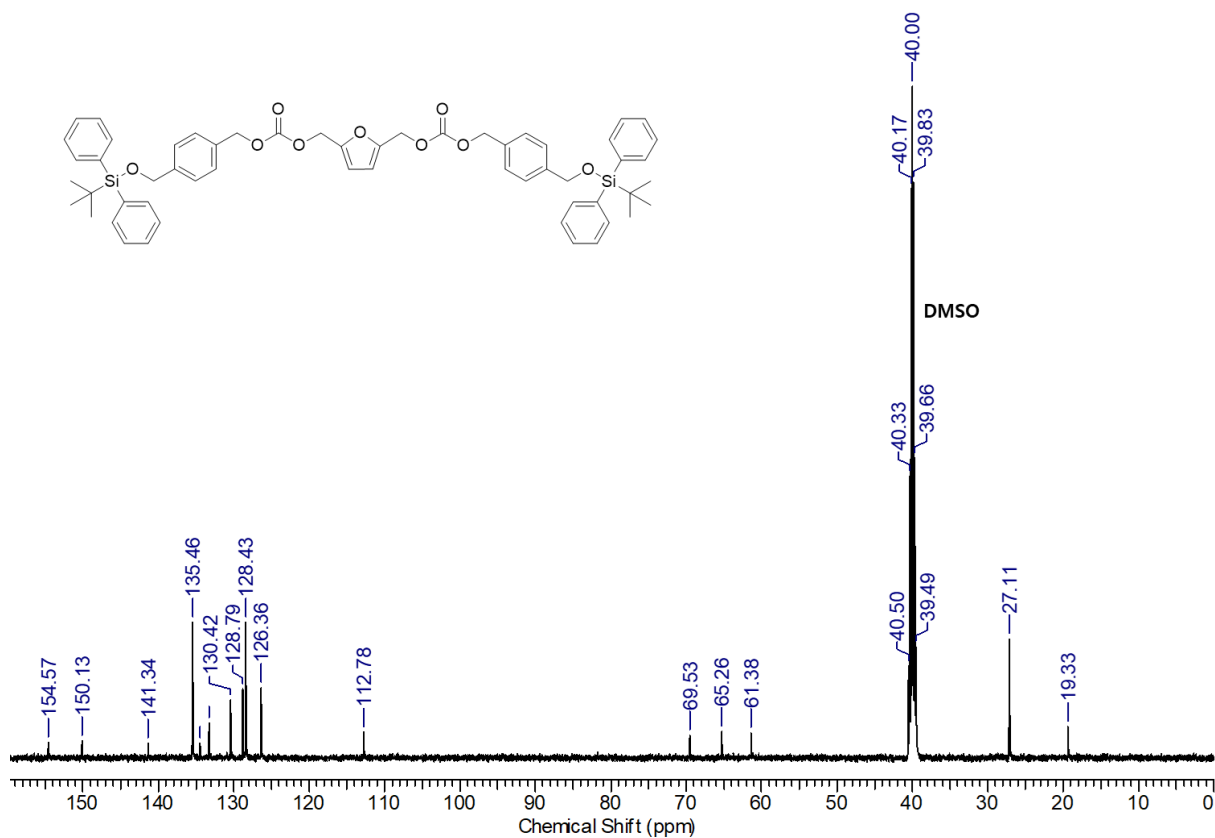

**Figure S10.** <sup>13</sup>C NMR spectrum of FCD-P3 (125 MHz, DMSO-*d*<sub>6</sub>)

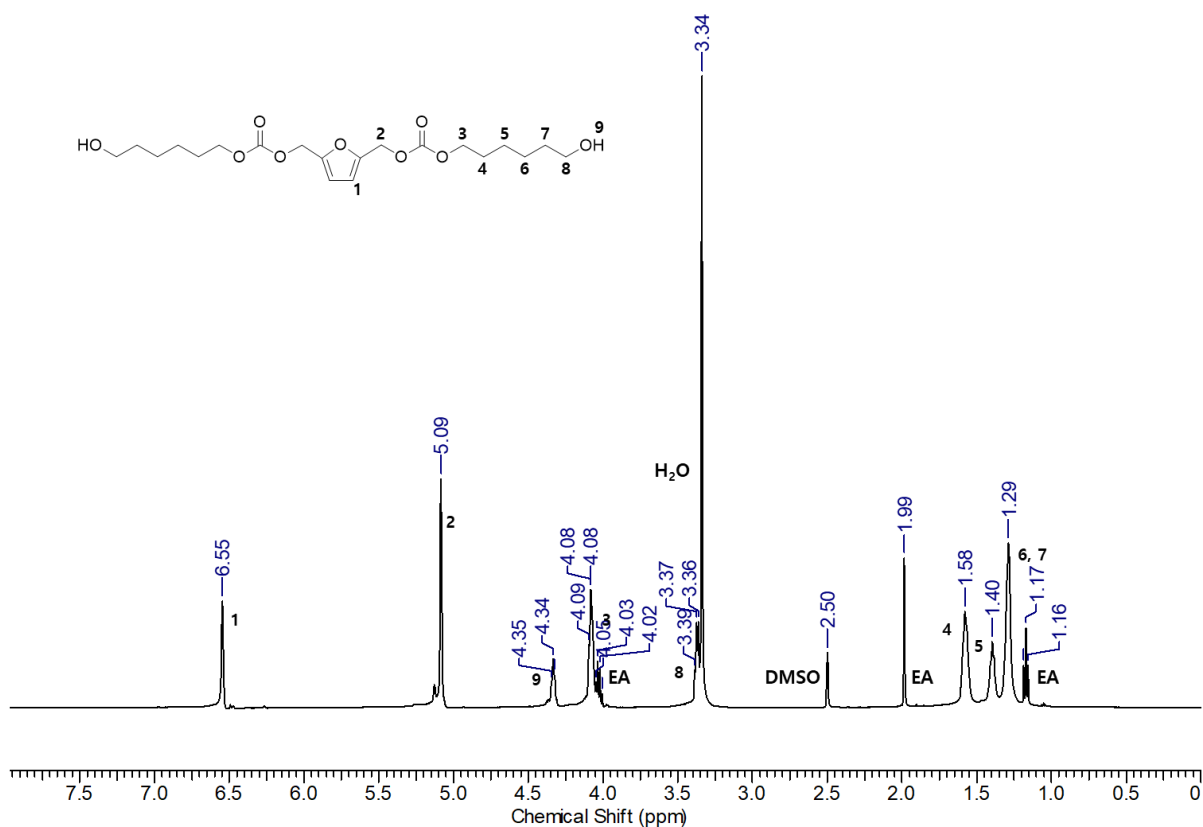

**Figure S11.** <sup>1</sup>H NMR spectrum of FCD-1 (500 MHz, DMSO-*d*<sub>6</sub>)

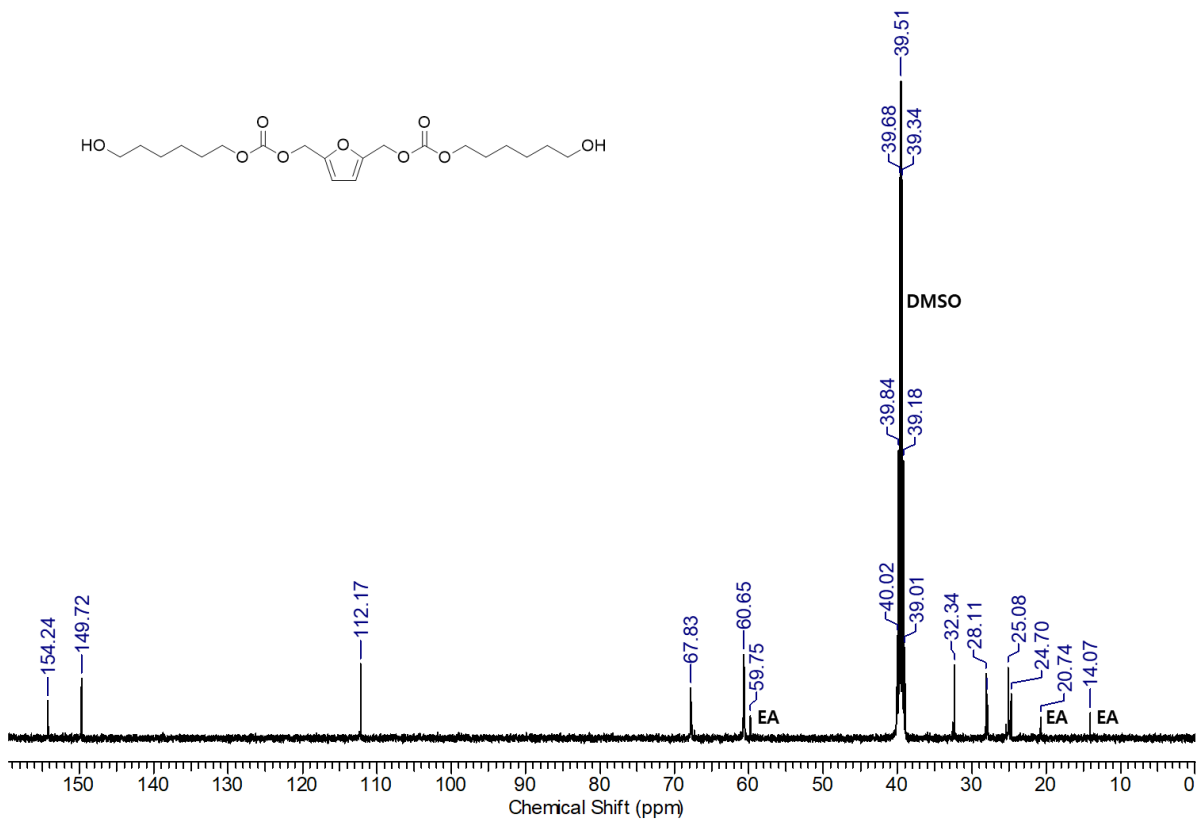

**Figure S12.** <sup>13</sup>C NMR spectrum of FCD-1 (125 MHz, DMSO-*d*<sub>6</sub>)

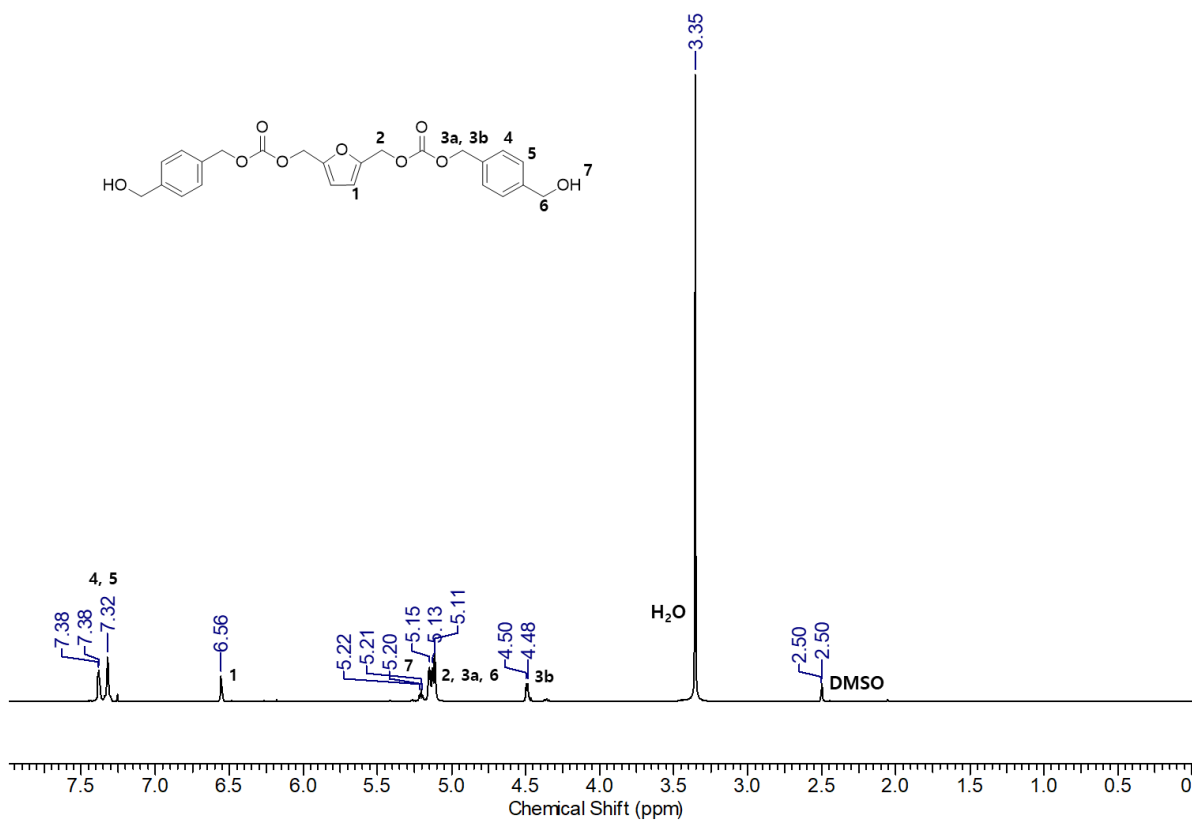

**Figure S13.** <sup>1</sup>H NMR spectrum of **FCD-3** (500 MHz, DMSO-*d*<sub>6</sub>)

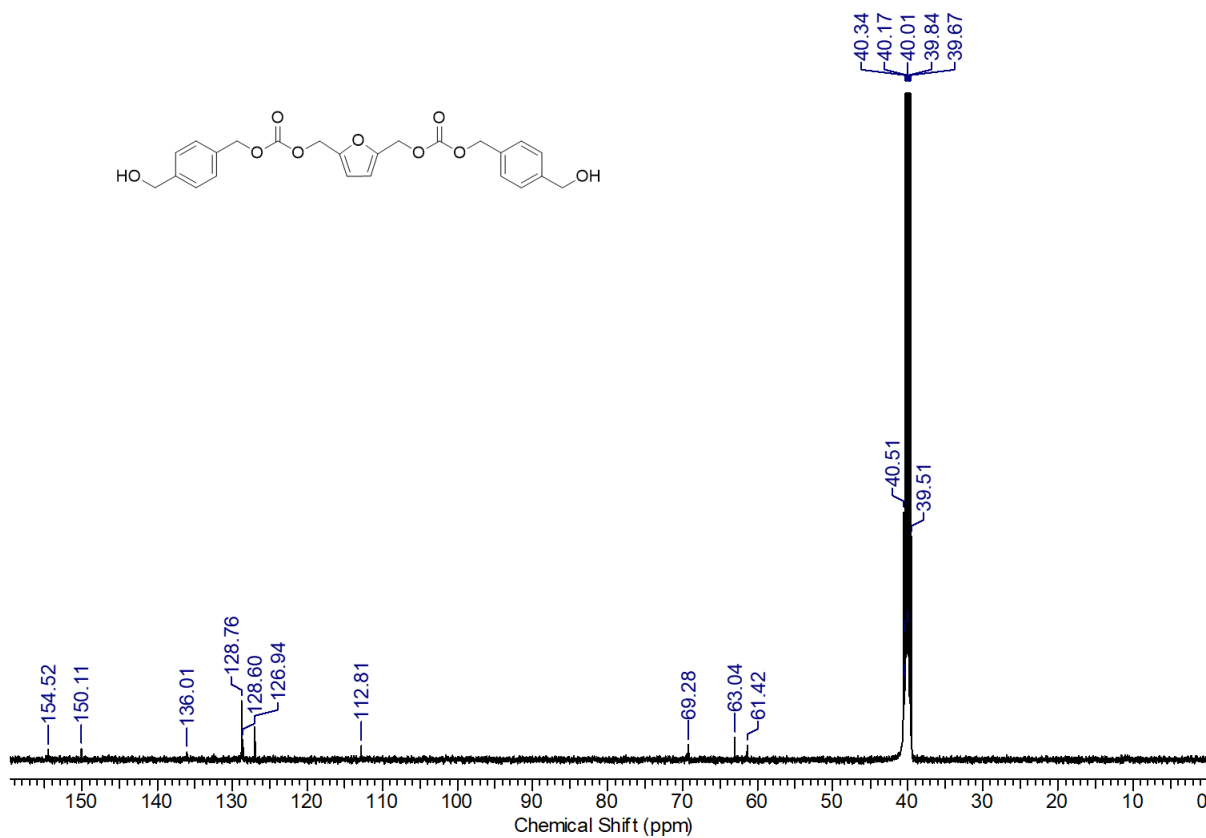

**Figure S14.** <sup>13</sup>C NMR spectrum of **FCD-3** (125 MHz, DMSO-*d*<sub>6</sub>)
